# Supplementary material for: Knockout of reactive astrocyte activating factors slows disease progression in an ALS mouse model
Source: PubMed Central journal article supplement (PMC7385161; doi:10.1038/s41467-020-17514-9), 2020-07-27
Supplement: 41467_2020_17514_MOESM1_ESM.pdf [file 41467_2020_17514_MOESM1_ESM.pdf]

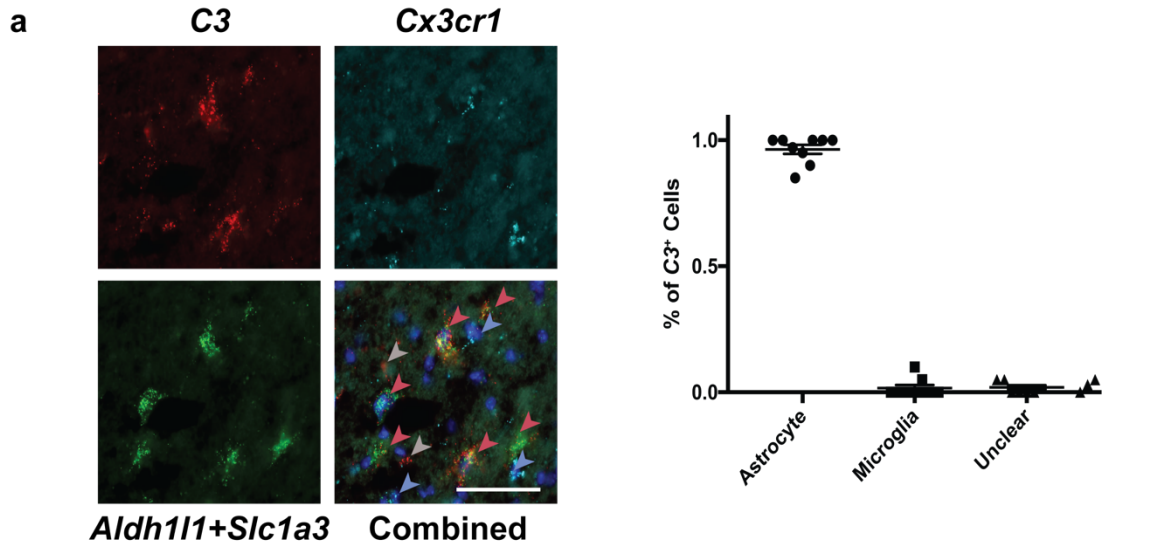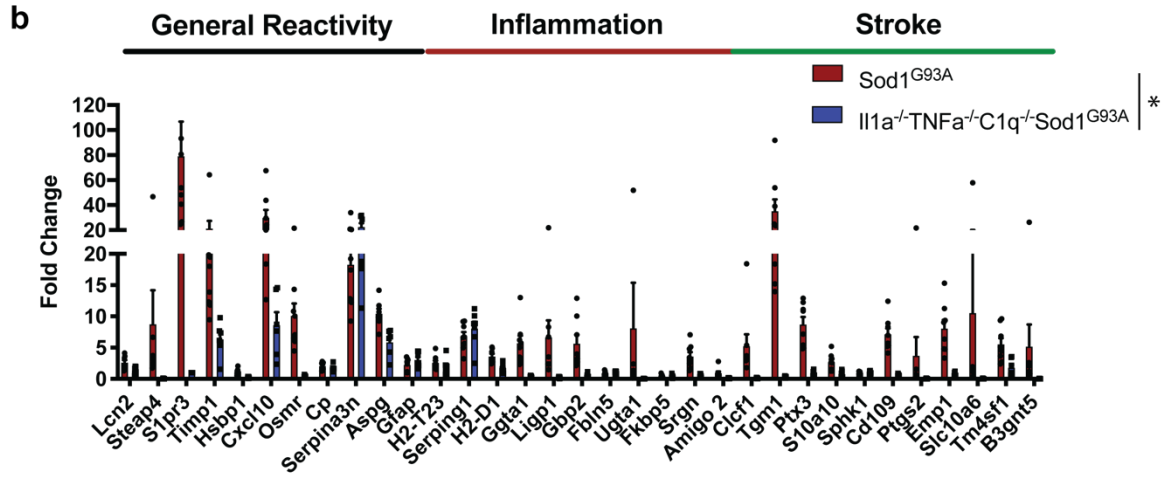

**Supplementary Figure 1. Astrocytes in the *Sod1*<sup>G93A</sup> spinal cord show broad reactivity.** **a.** We assessed the cell type specificity of C3 RNAscope *in situ* hybridization signal in the spinal cord by probing for *Aldh1l1+Slc1a3* for astrocytes and *Cx3cr1* for myeloid cells. Example image shows cells labeled as C3<sup>+</sup> astrocytes (red arrowhead), myeloid cells (blue arrowhead), and C3<sup>+</sup> cells of unknown cell-type (grey arrowhead). (scale bar = 50 μm) Quantification shows that the vast majority of C3 signal is associated with astrocytes. (lines represent mean ± SEM) **b.** We performed microfluidics qPCR on whole spinal cords from endpoint *Sod1*<sup>G93A</sup> and *IL-1α*<sup>-/-</sup> *TNFα*<sup>-/-</sup> *C1q*<sup>-/-</sup> *Sod1*<sup>G93A</sup> mice using our panel of genes that characterize astrocyte reactivity. *IL-1α*<sup>-/-</sup> *TNFα*<sup>-/-</sup> *C1q*<sup>-/-</sup> *Sod1*<sup>G93A</sup> mice show a broadly damped reactivity response compared to *Sod1*<sup>G93A</sup> mice (fold change relative to untreated control; error bars represent ± SEM; \* = p<0.0001 by paired, two-tailed paired t-test).

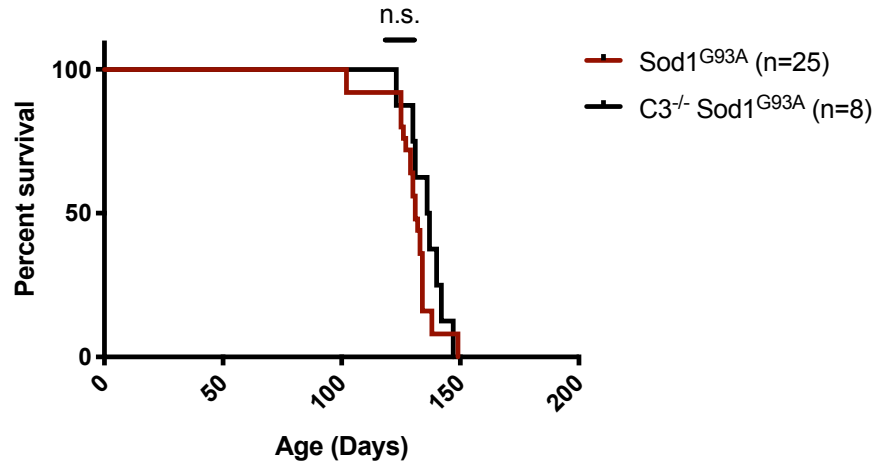

**Supplementary Figure 2. Knocking out the neuroinflammatory astrocyte marker C3 has no effect on lifespan in the Sod1<sup>G93A</sup> mouse model of ALS.** Survival curves of C3<sup>-/-</sup>Sod1<sup>G93A</sup> mice compared to Sod1<sup>G93A</sup> (Sod1<sup>G93A</sup> data also plotted in Figure 1c; n.s =  $p > 0.05$ ; Gehan-Breslow-Wilcoxon test)

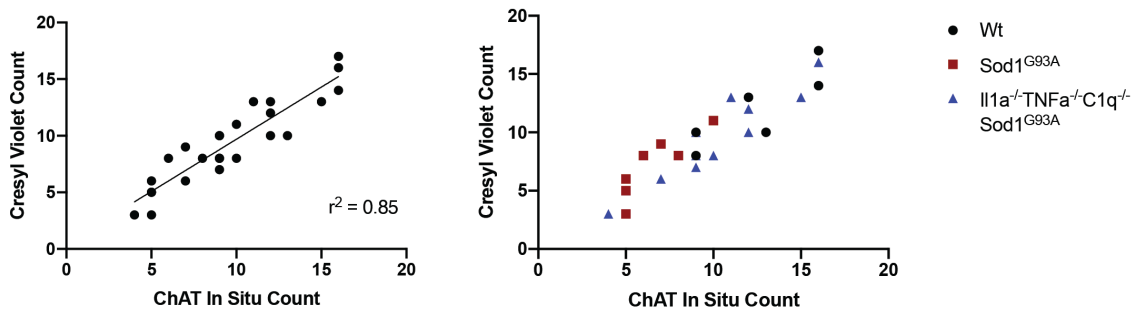

**Supplementary Figure 3. Comparison of motor neuron counts in selected images by Cresyl violet staining vs RNAscope *in situ* hybridization again *Chat*.** Comparison of ChAT *in situ* hybridization and Cresyl Violet methods of motor neuron quantification show similar results in a variety of genotypes.

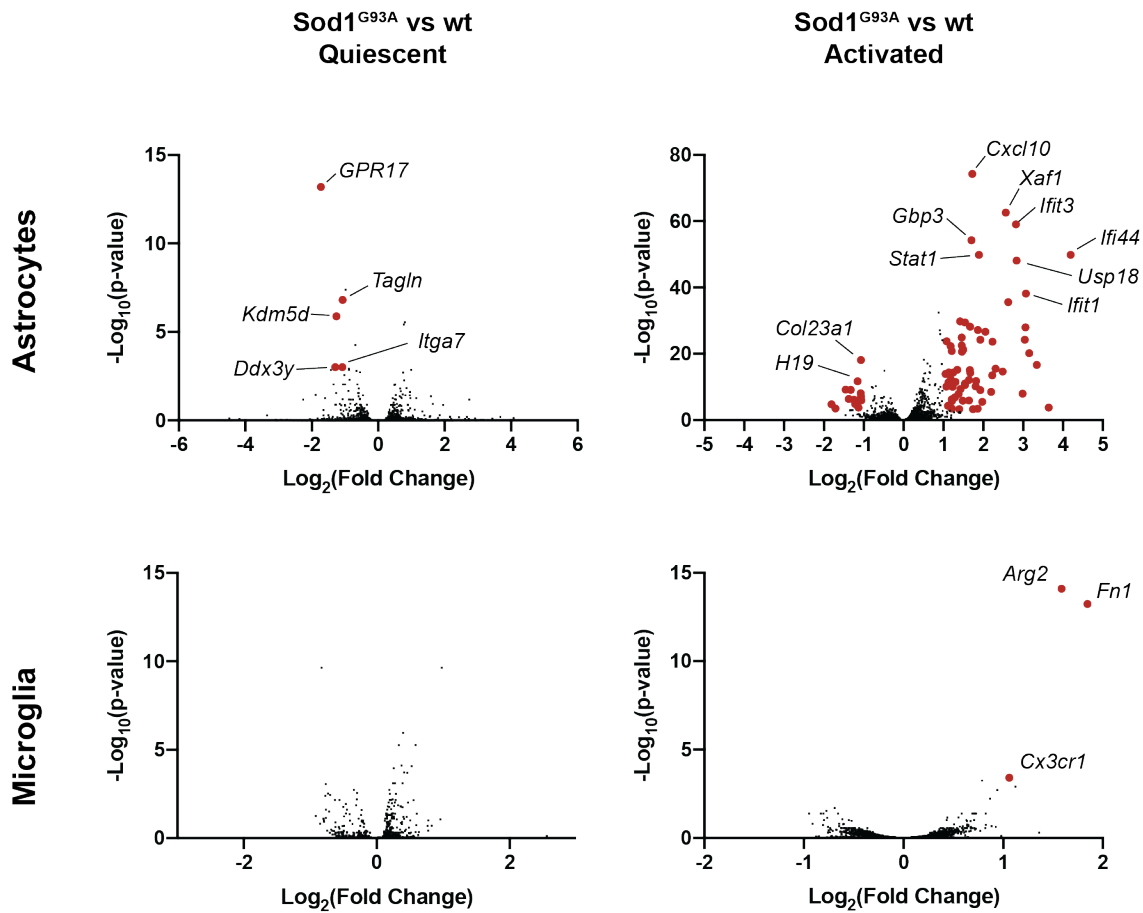

**Supplementary Figure 4. Detailed analysis of in vitro Sod1<sup>G93A</sup> vs wt astrocytes and microglia when quiescent and activated.** Data from Figure 2a-b,e-f re-graphed and partially annotated to show details of the slight differences between Sod1<sup>G93A</sup> and WT microglia when quiescent and the larger differences between Sod1<sup>G93A</sup> and WT astrocytes when quiescent and activated.

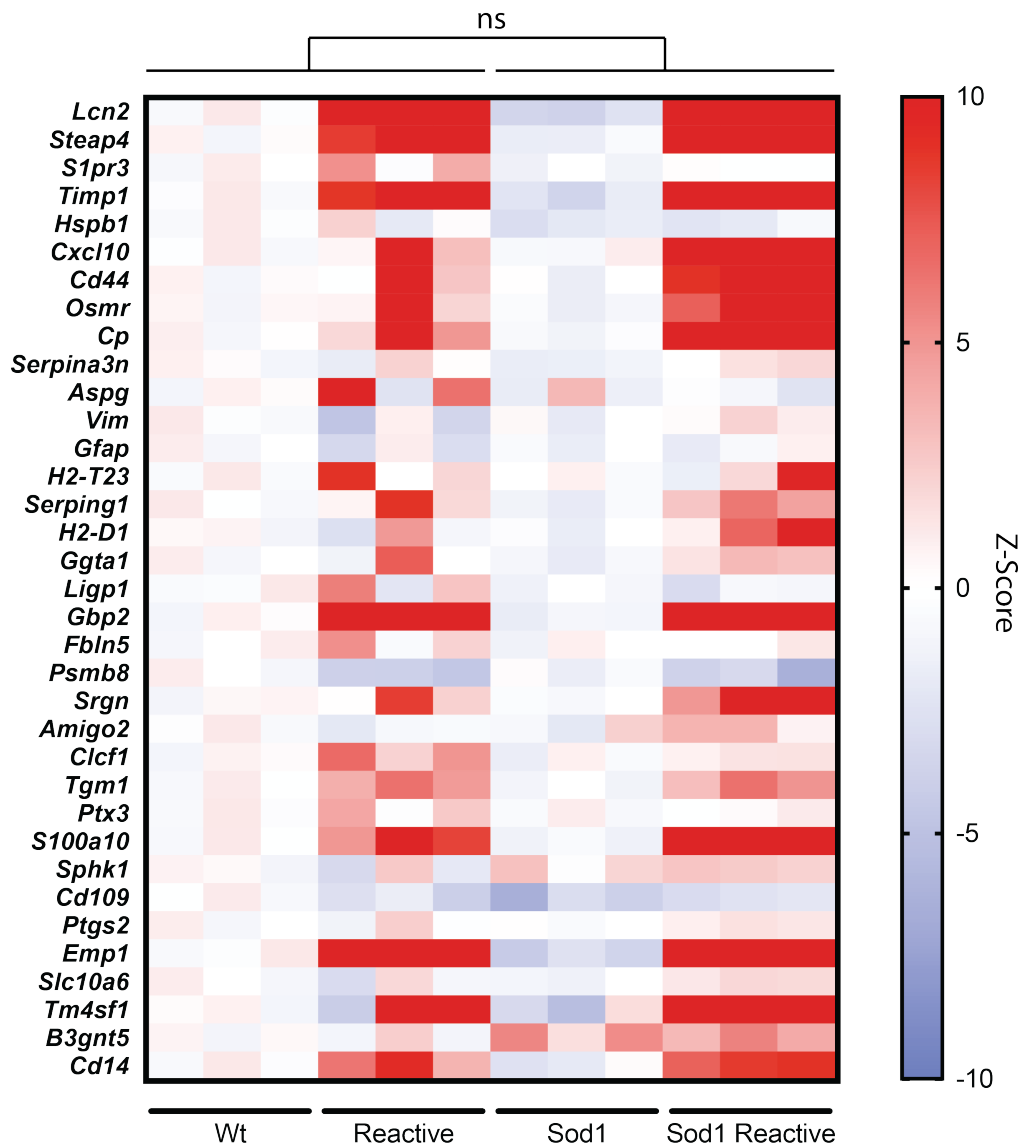

**Supplementary Figure 5. *In vitro* astrocytes show similar reactivity signature when fully activated.** We performed microfluidics qPCR on *in vitro* *Sod1*<sup>G93A</sup> and WT astrocytes grown in serum-free conditions to assess astrocyte reactivity subtype. The upregulation of astrocyte reactivity genes in response to maximum stimulation by IL-1 $\alpha$ , TNF $\alpha$ , and C1q was compared between *Sod1*<sup>G93A</sup> and WT cells. No significant difference in activation markers was found (two-tailed, unpaired Student's t-tests, corrected by Holm-Sidak method). Because we saw no difference in these markers in response to maximal activation, to assess the activation of astrocytes to subthreshold doses of IL-1 $\alpha$ , TNF $\alpha$ , and C1q we normalized the response of each gene to its maximum change in response to full activation.

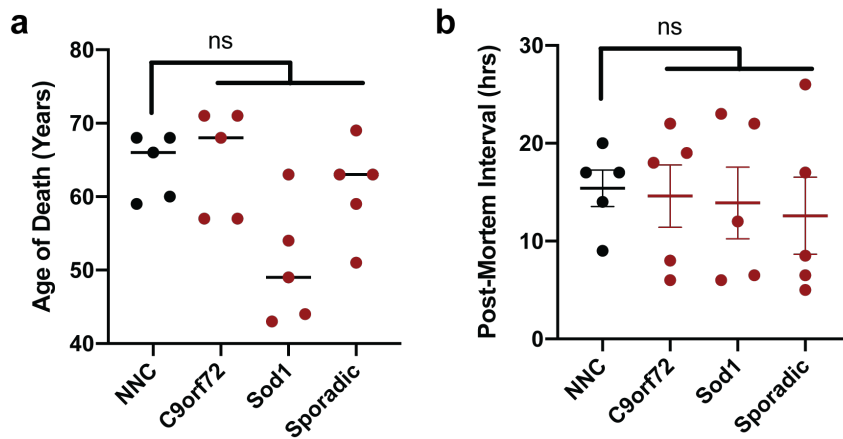

**Supplementary Figure 6. Human tissue samples are not significantly different in age of death or post-mortem interval of tissue collection.** **a.** Age of death is not significantly different between groups of human patient tissue. (lines represent means) **b.** Post-mortem interval between death and tissue collection is not significantly different between groups of human patient tissue. (NNC = non-neurological control; lines represent mean  $\pm$  SEM; ns =  $p > 0.05$  by Kruskal-Wallis non-parametric test corrected for multiple comparisons using the Dunn method)

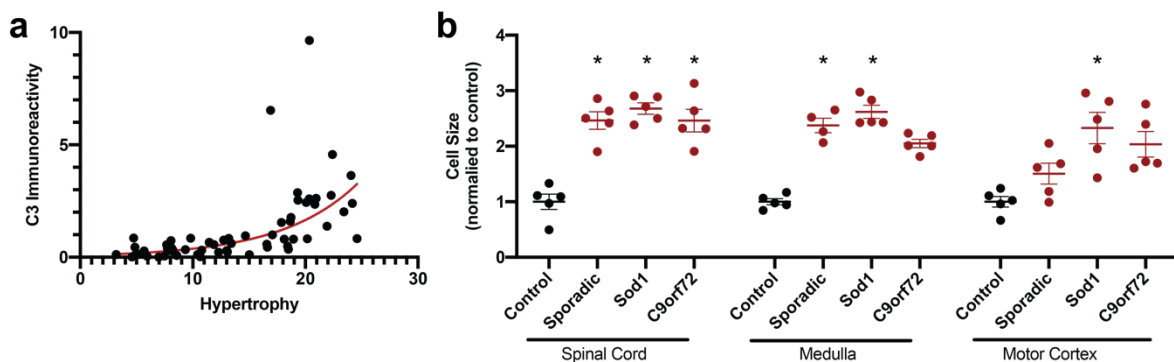

**Supplementary Figure 7. Relationship between C3 expression and hypertrophy in astrocytes from human tissue.** **a.** Comparing C3 immunoreactivity to percent GFAP<sup>+</sup> area in human tissue sections as a measure of cell body and process hypertrophy in individual images shows a positive relationship between the measures. Red line represents an exponential growth curve fit to the data. **b.** Percent GFAP<sup>+</sup> area in human tissues sections as a measure of hypertrophy normalized to control conditions shows significant astrocyte hypertrophy in many ALS patient conditions, especially in those areas with greater increases in C3<sup>+</sup> immunoreactivity (Figure 3) (lines represent mean  $\pm$  SEM; \* =  $p < 0.05$  by Kruskal-Wallis non-parametric test corrected for multiple comparisons using the Dunn method; mean  $\pm$  s.e.m.).

| Go Term                                                            | Fold Enrichment | FDR      |
|--------------------------------------------------------------------|-----------------|----------|
| positive regulation of interferon-gamma-mediated signaling pathway | > 100           | 8.46E-05 |
| defense response to protozoan                                      | 59.51           | 5.18E-09 |
| adhesion of symbiont to host                                       | 51.39           | 6.48E-04 |
| positive regulation of interferon-alpha production                 | 39.26           | 1.24E-04 |
| cytoplasmic pattern recognition receptor signaling pathway         | 35.33           | 2.58E-02 |

**Supplementary Table 1. Go Term analysis of Sod<sup>G93A</sup> reactive astrocyte genes.**

The 77 genes upregulated in activated Sod1<sup>G93A</sup> astrocytes vs wt activated astrocytes were analyzed by go-term analysis relative to all genes expressed in astrocytes using the Go Biological Process Complete annotation through Panther DB. Reported here are the 5 unique Go Terms with highest Fold Enrichment (manually compiled).

| Sample Group             | Sex    | Age of Death | PMI (h) |
|--------------------------|--------|--------------|---------|
| unremarkable adult brain | Male   | 59           | 17      |
| unremarkable adult brain | Male   | 68           | 14      |
| unremarkable adult brain | Male   | 66           | 20      |
| unremarkable adult brain | Female | 60           | 9       |
| unremarkable adult brain | Male   | 68           | 17      |
| C9orf72 expansion        | Male   | 57           | 6       |
| C9orf72 expansion        | Male   | 71           | 18      |
| C9orf72 expansion        | Male   | 57           | 22      |
| C9orf72 expansion        | Female | 71           | 19      |
| C9orf72 expansion        | Female | 68           | 8       |
| SOD1 c.374a>T,p.D125V    | Female | 63           | 6.5     |
| SOD1 c.14C>T,p.A5V       | Female | 54           | 6       |
| SOD1 c.13G>A,p.A5T       | Male   | 49           | 22      |
| SOD1 c.281G>C,p.G94A     | Female | 43           | 12      |
| SOD1 p.His47Asp          | Male   | 44           | 23      |
| sporadic                 | Male   | 51           | 17      |
| sporadic                 | Male   | 63           | 5       |
| sporadic                 | Male   | 63           | 6.5     |
| sporadic                 | Female | 59           | 26      |
| sporadic                 | Male   | 69           | 8.5     |

**Supplementary Table 2. Clinical characteristics of human post-mortem samples from ALS patients and non-neurological controls.** Basic clinical information for post-mortem samples.

| Figure                                                   | Condition                                                 | n                     | Figure                   | Condition                                                 | n                                |   |
|----------------------------------------------------------|-----------------------------------------------------------|-----------------------|--------------------------|-----------------------------------------------------------|----------------------------------|---|
| 1b                                                       | wt lumbar                                                 | 6                     | 1i                       | wt (125-150d) lumbar                                      | 6                                |   |
|                                                          | Sod1G93A (80-110d) lumbar                                 | 9                     |                          | Sod1G93A (125-150d) lumbar                                | 9                                |   |
|                                                          | Sod1G93A (125-150d) lumbar                                | 9                     |                          | Il1a-/-TNF $\alpha$ -/-C1q-/- (190-210d) lumbar           | 11                               |   |
|                                                          | Il1a-/-TNF $\alpha$ -/-C1q-/-Sod1G93A (190-210d) lumbar   | 8                     |                          | Il1a-/-TNF $\alpha$ -/-C1q-/-Sod1G93A (190-210d) lumbar   | 8                                |   |
|                                                          | wt thoracic                                               | 6                     |                          | wt (125-150d) thoracic                                    | 6                                |   |
|                                                          | Sod1G93A (80-110d) thoracic                               | 9                     |                          | Sod1G93A (125-150d) thoracic                              | 10                               |   |
|                                                          | Sod1G93A (125-150d) thoracic                              | 9                     |                          | Il1a-/-TNF $\alpha$ -/-C1q-/- (190-210d) thoracic         | 5                                |   |
|                                                          | Il1a-/-TNF $\alpha$ -/-C1q-/-Sod1G93A (125-150d) thoracic | 9                     |                          | Il1a-/-TNF $\alpha$ -/-C1q-/-Sod1G93A (190-210d) thoracic | 9                                |   |
|                                                          | wt cervical                                               | 6                     |                          | wt (125-150d) cervical                                    | 6                                |   |
|                                                          | Sod1G93A (80-110d) cervical                               | 8                     |                          | Sod1G93A (125-150d) cervical                              | 9                                |   |
|                                                          | Sod1G93A (125-150d) cervical                              | 7                     |                          | Il1a-/-TNF $\alpha$ -/-C1q-/- (190-210d) cervical         | 5                                |   |
|                                                          | Il1a-/-TNF $\alpha$ -/-C1q-/-Sod1G93A (125-150d) cervical | 9                     |                          | Il1a-/-TNF $\alpha$ -/-C1q-/-Sod1G93A (190-210d) cervical | 6                                |   |
|                                                          | wt medulla                                                | 3                     |                          | 2                                                         | Each genotype in each experiment | 3 |
|                                                          | Sod1G93A (80-110d) medulla                                | 3                     |                          | 3b                                                        | Control Spinal Cord              | 5 |
| Sod1G93A (125-150d) medulla                              | 3                                                         | Sporadic Spinal Cord  | 5                        |                                                           |                                  |   |
| Il1a-/-TNF $\alpha$ -/-C1q-/-Sod1G93A (125-150d) medulla | 3                                                         | Sod1 Spinal Cord      | 5                        |                                                           |                                  |   |
| wt cortex                                                | 3                                                         | C9orf72 Spinal Cord   | 5                        |                                                           |                                  |   |
| Sod1G93A (80-110d) cortex                                | 3                                                         | Control Medulla       | 5                        |                                                           |                                  |   |
| Sod1G93A (125-150d) cortex                               | 3                                                         | Sporadic Medulla      | 5                        |                                                           |                                  |   |
| Il1a-/-TNF $\alpha$ -/-C1q-/-Sod1G93A (125-150d) cortex  | 3                                                         | Sod1 Medulla          | 4                        |                                                           |                                  |   |
| 1c                                                       | Sod1G93A                                                  | 25                    | C9orf72 Medulla          |                                                           | 5                                |   |
| Il1a-/-TNF $\alpha$ -/-C1q-/-Sod1G93A                    | 19                                                        | Control Motor Cortex  | 5                        |                                                           |                                  |   |
| wt                                                       | 11                                                        | Sporadic Motor Cortex | 5                        |                                                           |                                  |   |
| 1d                                                       | Sod1G93A                                                  | 19                    | Sod1 Motor Cortex        | 5                                                         |                                  |   |
| Il1a-/-TNF $\alpha$ -/-C1q-/-                            | 12                                                        | C9orf72 Motor Cortex  | 5                        |                                                           |                                  |   |
| Il1a-/-TNF $\alpha$ -/-C1q-/-Sod1G93A                    | 19                                                        | 3c                    | Non-Neurological Control | 16                                                        |                                  |   |
| 1e                                                       | wt                                                        | 10                    | ALS                      | 148                                                       |                                  |   |
| Sod1G93A                                                 | 8                                                         | 3d                    | Non-Neurological Control | 16                                                        |                                  |   |
| Il1a-/-TNF $\alpha$ -/-C1q-/-                            | 7                                                         |                       | C9orf72                  | 15                                                        |                                  |   |
| Il1a-/-TNF $\alpha$ -/-C1q-/-Sod1G93A                    | 10                                                        |                       | Sporadic                 | 20                                                        |                                  |   |
| wt                                                       | 4                                                         |                       | Sod1                     | 5                                                         |                                  |   |
| 1g                                                       | Sod1G93A                                                  | 21                    | Other Genetic            | 22                                                        |                                  |   |
| Il1a-/-TNF $\alpha$ -/-C1q-/-                            | 5                                                         |                       |                          |                                                           |                                  |   |
| Il1a-/-TNF $\alpha$ -/-C1q-/-Sod1G93A                    | 26                                                        |                       |                          |                                                           |                                  |   |

**Supplementary Table 3. Technical Details of Experiments.** Number of biological replicates used in each experiment in the main figures of the manuscript.



| Figure                                                                    | Comparison                                                 | P Value (corrected, if applicable) |                                                      |
|---------------------------------------------------------------------------|------------------------------------------------------------|------------------------------------|------------------------------------------------------|
| 1b                                                                        | Medulla Sod1G93A vs wt                                     | 0.0239                             |                                                      |
|                                                                           | Medulla Il1a-/-TNFa-/-C1q-/-Sod1G93A vs Sod1G93A           | 0.0236                             |                                                      |
|                                                                           | Cervical Sod1G93A vs wt                                    | 0.0007                             |                                                      |
|                                                                           | Cervical Il1a-/-TNFa-/-C1q-/-Sod1G93A vs Sod1G93A          | 0.0006                             |                                                      |
|                                                                           | Thoracic Sod1G93A vs wt                                    | 0.0239                             |                                                      |
|                                                                           | Thoracic Il1a-/-TNFa-/-C1q-/-Sod1G93A vs Sod1G93A          | 0.0091                             |                                                      |
|                                                                           | Lumbar Sod1G93A vs wt                                      | 0.0007                             |                                                      |
| 1c                                                                        | Lumbar Il1a-/-TNFa-/-C1q-/-Sod1G93A vs Sod1G93A            | 0.0006                             |                                                      |
|                                                                           | Il1a-/-TNFa-/-C1q-/-Sod1G93A vs Sod1G93A                   | <0.0001                            |                                                      |
| 1d                                                                        | Time (weeks)                                               | Sod1G93A vs wt                     | Il1a-/-TNFa-/-C1q-/-Sod1G93A vs Il1a-/-TNFa-/-C1q-/- |
|                                                                           | 8                                                          | 0.8694                             | 0.9387                                               |
|                                                                           | 9                                                          | 0.2687                             | 0.9173                                               |
|                                                                           | 10                                                         | 0.1997                             | 0.1712                                               |
|                                                                           | 11                                                         | 0.0039                             | 0.3245                                               |
|                                                                           | 12                                                         | 0.0003                             | 0.0321                                               |
|                                                                           | 13                                                         | <0.0001                            | 0.0141                                               |
|                                                                           | 14                                                         | <0.0001                            | 0.014                                                |
|                                                                           | 15                                                         | <0.0001                            | <0.0001                                              |
|                                                                           | 16                                                         | <0.0001                            | <0.0001                                              |
|                                                                           | 17                                                         | <0.0001                            | <0.0001                                              |
|                                                                           | 18                                                         | <0.0001                            | <0.0001                                              |
|                                                                           | 19                                                         | <0.0001                            | <0.0001                                              |
|                                                                           | 20                                                         | <0.0001                            | <0.0001                                              |
|                                                                           | 21                                                         | <0.0001                            | <0.0001                                              |
|                                                                           | 22                                                         | <0.0001                            | <0.0001                                              |
|                                                                           | 23                                                         | <0.0001                            | <0.0001                                              |
|                                                                           | 24                                                         | <0.0001                            | <0.0001                                              |
|                                                                           | 25                                                         | <0.0001                            | <0.0001                                              |
|                                                                           | 26                                                         | <0.0001                            | <0.0001                                              |
| 27                                                                        | <0.0001                                                    | <0.0001                            |                                                      |
| 28                                                                        | <0.0001                                                    | <0.0001                            |                                                      |
| 29                                                                        | 0.0054                                                     | <0.0001                            |                                                      |
| 30                                                                        | <0.0001                                                    | <0.0001                            |                                                      |
| 1i                                                                        | Cervical Sod1G93A (125-150d) vs wt                         | 0.1108                             |                                                      |
|                                                                           | Cervical Il-1a-/- TNFa-/- C1q-/- Sod1G93A (125-150d) vs wt | 0.9968                             |                                                      |
|                                                                           | Cervical Il-1a-/- TNFa-/- C1q-/- Sod1G93A (190-210d) vs wt | 0.9951                             |                                                      |
|                                                                           | Thoracic Sod1G93A (125-150d) vs wt                         | 0.8310                             |                                                      |
|                                                                           | Thoracic Il-1a-/- TNFa-/- C1q-/- Sod1G93A (125-150d) vs wt | 0.9997                             |                                                      |
|                                                                           | Thoracic Il-1a-/- TNFa-/- C1q-/- Sod1G93A (190-210d) vs wt | 0.9961                             |                                                      |
|                                                                           | Lumbar Sod1G93A (125-150d) vs wt                           | 0.0032                             |                                                      |
|                                                                           | Lumbar Il-1a-/- TNFa-/- C1q-/- Sod1G93A (125-150d) vs wt   | >0.9999                            |                                                      |
| Lumbar Il-1a-/- TNFa-/- C1q-/- Sod1G93A (190-210d) vs wt                  | 0.1177                                                     |                                    |                                                      |
| Lumbar Il-1a-/- TNFa-/- C1q-/- Sod1G93A (190-210d) vs Sod1G93A (125-150d) | 0.9888                                                     |                                    |                                                      |
| 2h                                                                        | TNFa Sod1 vs wt 0 ng/ml                                    | 0.988753                           |                                                      |
|                                                                           | TNFa Sod1 vs wt 0.5 ng/ml                                  | 0.046320                           |                                                      |
|                                                                           | TNFa Sod1 vs wt 1 ng/ml                                    | 0.002126                           |                                                      |
|                                                                           | TNFa Sod1 vs wt 5 ng/ml                                    | <0.000001                          |                                                      |
|                                                                           | Il-1a Sod1 vs wt 0 ng/ml                                   | >0.999999                          |                                                      |
|                                                                           | Il-1a Sod1 vs wt 0.5 ng/ml                                 | 0.000290                           |                                                      |
|                                                                           | Il-1a Sod1 vs wt 1 ng/ml                                   | 0.000004                           |                                                      |
|                                                                           | Il-1a Sod1 vs wt 5 ng/ml                                   | 0.000290                           |                                                      |
|                                                                           | CCL2 Sod1 vs wt 0 ng/ml                                    | 0.963046                           |                                                      |
|                                                                           | CCL2 Sod1 vs wt 0.5 ng/ml                                  | 0.022432                           |                                                      |
|                                                                           | CCL2 Sod1 vs wt 1 ng/ml                                    | 0.000084                           |                                                      |
|                                                                           | CCL2 Sod1 vs wt 5 ng/ml                                    | 0.000122                           |                                                      |
|                                                                           | Il-6 Sod1 vs wt 0 ng/ml                                    | 0.958231                           |                                                      |
|                                                                           | Il-6 Sod1 vs wt 0.5 ng/ml                                  | 0.007008                           |                                                      |
|                                                                           | Il-6 Sod1 vs wt 1 ng/ml                                    | 0.097128                           |                                                      |
|                                                                           | Il-6 Sod1 vs wt 5 ng/ml                                    | 0.085450                           |                                                      |
| Cd69 Sod1 vs wt 0 ng/ml                                                   | >0.999999                                                  |                                    |                                                      |
| Cd69 Sod1 vs wt 0.5 ng/ml                                                 | 0.000063                                                   |                                    |                                                      |
| Cd69 Sod1 vs wt 1 ng/ml                                                   | 0.046054                                                   |                                    |                                                      |
| Cd69 Sod1 vs wt 5 ng/ml                                                   | 0.046054                                                   |                                    |                                                      |
| Nos2 Sod1 vs wt 0 ng/ml                                                   | 0.980860                                                   |                                    |                                                      |
| Nos2 Sod1 vs wt 0.5 ng/ml                                                 | 0.496032                                                   |                                    |                                                      |
| Nos2 Sod1 vs wt 1 ng/ml                                                   | 0.044997                                                   |                                    |                                                      |

|    |                                  |           |
|----|----------------------------------|-----------|
|    | Nos2 Sod1 vs wt 5 ng/ml          | <0.000001 |
| 3b | Spinal Cord Sporadic vs Control  | 0.0485    |
|    | Spinal Cord Sod1 vs Control      | 0.0117    |
|    | Spinal Cord C9orf72 vs Control   | 0.0192    |
|    | Medulla Sporadic vs Control      | 0.0022    |
|    | Medulla Sod1 vs Control          | 0.0066    |
|    | Medulla C9orf72 vs Control       | 0.5886    |
|    | Motor Cortex Sporadic vs Control | 0.0099    |
| 3c | ALS vs Control                   | <0.0001   |
|    | C9orf72 vs Control               | <0.0001   |
|    | Sporadic vs Control              | 0.0017    |
| 3d | Sod1 vs Control                  | <0.0001   |
|    | Other Genetic vs Control         | <0.0001   |

**Supplementary Table 4. Statistical Details of Experiments.** Exact p-values for statistical comparisons in main figures.

| Gene      | Forward                  | Reverse                 |
|-----------|--------------------------|-------------------------|
| Lcn2      | CCGACACTGACTACGACCAG     | AATGCATTGGTCGGTGGGAA    |
| Steap4    | CAAACGCCGAGTACCTTGCT     | CAGACAAACACCTGCCGACT    |
| S1pr3     | CTTGACAGAACGAGAGCCTGT    | CCTCAACAGTCCACGAGAGG    |
| Timp1     | CGCTAGAGCAGATACCACGA     | CCAGGTCCGAGTTGCAGAAA    |
| Hspb1     | GAGATCACTGGCAAGCACGA     | ATTGTGTGACTGCTTTGGGC    |
| Cxcl10    | TGCAAGTCTATCCTGTCCGC     | ACGGAGCTCTTTTTGACCTTC   |
| Cd44      | TCAGGATAGCCCACAACAAC     | GACTCCGTACCAGGCATCTTC   |
| Osmr      | GTCATTCTGGACATGAAGAGGT   | AATCACAGCGTTGGGTCTGA    |
| Cp        | GATGTTTCCCAACGCCTG       | GTAGCTCTGAGACGATGCTTGA  |
| Serpina3n | GTCTTTCAGGTGGTCCACAAGG   | GCCAATCACAGCATAGAAGCG   |
| Aspg      | CAGGTGCCAGGTTTCTATC      | GTCCACCTTGGTTGTCGGAT    |
| Vim       | GAGGAGATGAGGGAGTTGCC     | CTGCAATTTTTCTCGCAGCC    |
| Gfap      | AACCGCATCACCATTCTGT      | TCCTTAATGACCTGCCATCC    |
| H2-T23    | ATTGGAGCTGTTGTGAGGAGG    | CCACGAGGCAACTGCTTTTTC   |
| Serping1  | TGGCTCAGAGGCTAACTGGC     | GAATCTGAGAAGGCTCTATCCCA |
| H2-D1     | ATGGAACCTTCCAGAAGTGGG    | GAAGTAAGTTGGAGTCGGTGA   |
| Ggta1     | TCTCAGGATCTGGGAGTTGGA    | GAGTTCTATGGAGCTCCCGC    |
| Ligp1     | ATTTGGCTCGAAGCCTTTGC     | ACGGCATTGGCCAGCTTGA     |
| Gbp2      | TAAAGGTCCGAGGCCCAAAC     | AACATATGTGGCTGGGCGAA    |
| Fbln5     | AGGGGGTTAAGCGAAACCAG     | GTGAGTATCCTTTAATCCTGGCA |
| Psmb8     | TATCTGCGGAATGGGGAACG     | AAAGTCCCGGTCCCTTCTTG    |
| Srgn      | GTTCAAGTTATCCTGCTCGGA    | AAACAGGATCGGTATCGGG     |
| Amigo2    | GTTCCGCCACAACAACATCAC    | GTTTCTGCAAGTGGGAGAGC    |
| Clcf1     | GACTCGTGGGGGATGTTAGC     | CCCCAGGTAGTTCAGGTAGGT   |
| Tgm1      | AGACCCAATTTTCTGGGGC      | AGCGAGGACCTCCATTGTG     |
| Ptx3      | CATCCCGTTCAAGCTTTGGA     | CACAGGGAAAGAAGCGAGGT    |
| S100a10   | GAAAGGGAGTTCCTGGGTT      | CCCCTTTTCCATCTCGGCA     |
| Sphk1     | AAAGCGAGACCCTGTTCCAG     | CAGTCTGCTGGTTGCATAGC    |
| Cd109     | GTCGCTCACAGGTACCTCAA     | CTGTGAAGTTGAGCGTTGGC    |
| Ptgs2     | CTCAGCCATGCAGCAAATCC     | GGGTGGGCTTCAGCAGTAAT    |
| Emp1      | ACCATTGCCAACGTCTGGAT     | TGGAACACGAAGACCACGAG    |
| Slc10a6   | TCCATAGAGACCGGAGCACA     | ATGCCTGATATGCTGCGACA    |
| Tm4sf1    | CTGAGGGACAGTACCTTCTGGATT | GGCTAGGCCTCAACACAGTTA   |
| B3gnt5    | TGCTCCTGGATGAAAGGTCC     | ACATGCTTGATCCGTGTGGT    |
| Cd14      | TCAGAATCTACCGACCATGAAGC  | GGACACTTTCCTCGTCTGG     |

**Supplementary Table 5. Primers used in Supplementary Figure 5.** Primers used for microfluidics qPCR quantification of mouse astrocyte reactivity.
