# Supplementary material for: Knockout of reactive astrocyte activating factors slows disease progression in an ALS mouse model
Source: PubMed Central journal article supplement (PMC7385161; doi:10.1038/s41467-020-17514-9), 2020-07-27
Supplement: 41467_2020_17514_MOESM2_ESM.pdf [file 41467_2020_17514_MOESM2_ESM.pdf]

**Editorial Note:** This manuscript has been previously reviewed at another journal that is not operating a transparent peer review scheme. The manuscript was considered suitable for publication without further review at *Nature Communications*.
